# Supplementary material for: Coordination of o-benzosemiquinonate, o-iminobenzosemiquinonate and aldimine anion radicals to oxidovanadium(iv)
Source: Royal Society of Chemistry journal article supplement (doi:10.1039/c7nj00186j), 2017-01-01
Supplement: c7nj00186j1.pdf [file c7nj00186j1.pdf]

Submitted to New J. Chem.

Electronic Supporting Information (ESI)

**Coordination of *o*-benzosemiquinonate, *o*-iminobenzosemiquinonate and aldimine anion radicals to oxidovanadium(IV)**

Madhusudan Shit,<sup>a,b</sup> Sachinath Bera,<sup>a</sup> Suwendu Maity,<sup>a</sup> Thomas Weyhermüller<sup>c</sup> and Prasanta Ghosh<sup>a\*</sup>

<sup>a</sup>Department of Chemistry, R. K. Mission Residential College, Narendrapur, Kolkata-103, India

<sup>b</sup>Department of Chemistry, Dinabandhu Andrews College, Garia, Kolkata-84, India

<sup>c</sup>Max-Planck-Institut für Chemische Energiekonversion, Stiftstrasse 34-36, D-45470 Mülheim, Germany

\*Correspondence to: ghosh@pghosh.in

Table of Content

|                                                                                                                          | Page No. |
|--------------------------------------------------------------------------------------------------------------------------|----------|
| Crystallographic parameters of <b>1</b> , <b>4</b> , <b>5</b> and <b>6</b> ·½CH <sub>2</sub> Cl <sub>2</sub> ,           | S2       |
| Selected experimental bond lengths (Å) of <b>1</b> and the calculated bond lengths of <b>1</b> and <b>1</b> <sup>-</sup> | S3       |
| Selected experimental bond lengths (Å) of <b>4</b> and <b>5</b> and the corresponding calculated bond lengths            | S4       |
| Selected experimental bond lengths (Å) of <b>6</b> ·½CH <sub>2</sub> Cl <sub>2</sub>                                     | S4       |
| Fluid solution <sup>51</sup> V NMR of <b>3</b> , <b>4</b> and <b>5</b>                                                   | S5       |
| ESI-MS spectrum of <b>1-6</b>                                                                                            | S6-S8    |
| FT-IR spectra of <b>1-6</b>                                                                                              | S9-S10   |
| Gas phase optimized coordinates of <b>1</b>                                                                              | S11      |
| Gas phase optimized coordinates of <b>1</b> <sup>-</sup>                                                                 | S12      |
| Gas phase optimized coordinates of <b>2</b>                                                                              | S13      |
| Gas phase optimized coordinates of <b>2</b> <sup>-</sup>                                                                 | S14      |
| Gas phase optimized coordinates of <b>4</b>                                                                              | S15      |
| Gas phase optimized coordinates of <b>5</b>                                                                              | S17      |

**Table S1** Crystallographic parameters of **1**, **4**, **5** and **6**·½CH<sub>2</sub>Cl<sub>2</sub>,

| CCDC                                    | <b>1</b><br>(1506825)                                           | <b>4</b><br>(1506827)                                           | <b>5</b><br>(1506828)                                           | <b>6</b> ·½CH <sub>2</sub> Cl <sub>2</sub><br>(1506826)                            |
|-----------------------------------------|-----------------------------------------------------------------|-----------------------------------------------------------------|-----------------------------------------------------------------|------------------------------------------------------------------------------------|
| formula                                 | C <sub>21</sub> H <sub>18</sub> N <sub>2</sub> O <sub>4</sub> V | C <sub>30</sub> H <sub>31</sub> N <sub>2</sub> O <sub>4</sub> V | C <sub>22</sub> H <sub>15</sub> N <sub>4</sub> O <sub>5</sub> V | C <sub>32.50</sub> H <sub>23</sub> ClN <sub>4</sub> O <sub>8</sub> SV <sub>2</sub> |
| fw                                      | 413.31                                                          | 534.51                                                          | 466.32                                                          | 766.94                                                                             |
| crystal syst.                           | monoclinic                                                      | monoclinic                                                      | monoclinic                                                      | monoclinic                                                                         |
| crystal color                           | black                                                           | green                                                           | brown                                                           | yellow                                                                             |
| space group                             | P2 <sub>1</sub> /c                                              | P2 <sub>1</sub> /c                                              | P2 <sub>1</sub> /c                                              | C2/c                                                                               |
| a (Å)                                   | 15.213(3)                                                       | 15.194(2)                                                       | 10.4417(3)                                                      | 29.889(2)                                                                          |
| b (Å)                                   | 9.5292(12)                                                      | 19.427(2)                                                       | 17.7670(5)                                                      | 14.1920(8)                                                                         |
| c (Å)                                   | 12.588(2)                                                       | 9.3109(5)                                                       | 10.7908(3)                                                      | 20.219(2)                                                                          |
| α (deg)                                 | 90.00                                                           | 90.00                                                           | 90.00                                                           | 90.00                                                                              |
| β (deg)                                 | 99.66(2)                                                        | 106.744(6)                                                      | 101.367(2)                                                      | 129.985(4)                                                                         |
| γ (deg)                                 | 90.00                                                           | 90.00                                                           | 90.00                                                           | 90.00                                                                              |
| V (Å <sup>3</sup> )                     | 1799.0(5)                                                       | 2631.8(5)                                                       | 1962.6(5)                                                       | 6571.4(8)                                                                          |
| Z                                       | 4                                                               | 4                                                               | 4                                                               | 8                                                                                  |
| T (K)                                   | 100(2)                                                          | 100(2)                                                          | 295(2)                                                          | 293(2)                                                                             |
| 2θ                                      | 66.14                                                           | 66.18                                                           | 56.04                                                           | 56.60                                                                              |
| ρ calcd (g.cm <sup>-3</sup> )           | 1.526                                                           | 1.349                                                           | 1.578                                                           | 1.550                                                                              |
| refl. collected                         | 31861                                                           | 82107                                                           | 16585                                                           | 51619                                                                              |
| unique refl.                            | 6823                                                            | 10053                                                           | 4857                                                            | 8166                                                                               |
| reflection                              | 4923                                                            | 8523                                                            | 3424                                                            | 6169                                                                               |
| (I>2σ(I))                               |                                                                 |                                                                 |                                                                 |                                                                                    |
| F(000)                                  | 852                                                             | 1120                                                            | 952                                                             | 3112                                                                               |
| no. of                                  | 255/0                                                           | 340/0                                                           | 289/0                                                           | 438/0                                                                              |
| params/restr                            |                                                                 |                                                                 |                                                                 |                                                                                    |
| λ (Å)/μ(mm <sup>-1</sup> )              | 0.71073<br>/0.583                                               | 0.71073<br>/0.415                                               | 0.71073<br>/0.551                                               | 0.71073<br>/0.771                                                                  |
| R1a[I > 2σ<br>(I)]/GOFb                 | 0.0479/<br>1.060                                                | 0.0336/<br>0.0841                                               | 0.0557/1.022                                                    | 0.0569/<br>1.054                                                                   |
| wR2c [I > 2σ<br>(I)]                    | 0.0819                                                          | 0.0437                                                          | 0.0872                                                          | 0.0781                                                                             |
| residual density<br>(eÅ <sup>-3</sup> ) | 0.484                                                           | 0.429                                                           | 0.508                                                           | 1.320                                                                              |

observation criterion: <sup>a</sup>R1 = Σ||Fo|-|Fc||/Σ|Fo|. <sup>b</sup>GOF = {Σ[w(Fo2-Fc2)2]/(n-p)} 1/2, cwR2 = [Σ[w(Fo2-Fc2)2]/Σ[w(Fo2)2]] 1/2 where w = 1/[σ2(Fo2)+(aP)2+bP], P = (Fo2+2Fc2)/3.

**Table S2** Selected experimental bond lengths (Å) of **1** and the calculated bond lengths of **1**, **2**, **1<sup>-</sup>** and **2<sup>-</sup>**

|                                | exp.          | calc.     |                      |          |                      |
|--------------------------------|---------------|-----------|----------------------|----------|----------------------|
|                                | <b>1</b>      | <b>1</b>  | <b>1<sup>-</sup></b> | <b>2</b> | <b>2<sup>-</sup></b> |
| V(1)-O(1) <sub>phenolato</sub> | 1.951(2)<br>) | 1.95<br>9 | 1.99<br>2            | 1.941    | 1.963                |
| V(1)-N(9) <sub>imine</sub>     | 2.076(2)<br>) | 2.10<br>1 | 2.06<br>7            | 2.110    | 2.038                |
| V(1)-N(18) <sub>py</sub>       | 2.129(2)<br>) | 2.15<br>7 | 2.18<br>6            | 2.168    | 2.204                |
| V(1)-O(21) <sub>acac</sub>     | 2.144(2)<br>) | 2.24<br>4 | 2.33<br>3            | 2.243    | 2.338                |
| V(1)-O(25) <sub>acac</sub>     | 1.989(2)<br>) | 2.00<br>2 | 2.02<br>6            | 2.001    | 2.024                |
| V(1)-O(30) <sub>oxo</sub>      | 1.614(2)<br>) | 1.58<br>9 | 1.59<br>8            | 1.589    | 1.595                |
| O(1)-C(2)                      | 1.320(2)<br>) | 1.29<br>6 | 1.29<br>9            | 1.305    | 1.307                |
| C(2)-C(7)                      | 1.427(2)<br>) | 1.44<br>4 | 1.44<br>8            | 1.456    | 1.465                |
| C(7)-C(8)                      | 1.428(2)<br>) | 1.42<br>5 | 1.43<br>5            | 1.433    | 1.437                |
| C(8)-N(9)                      | 1.299(2)<br>) | 1.30<br>9 | 1.32<br>4            | 1.303    | 1.329                |
| N(9)-C(10)                     | 1.423(2)<br>) | 1.40<br>8 | 1.38<br>1            | 1.409    | 1.377                |
| C(10)-C(19)                    | 1.420(2)<br>) | 1.43<br>3 | 1.43<br>6            | 1.433    | 1.435                |
| N(18)-C(19)                    | 1.369(2)<br>) | 1.36<br>5 | 1.36<br>1            | 1.364    | 1.359                |
| O(21)-C(22)                    | 1.261(2)<br>) | 1.26<br>3 | 1.25<br>9            | 1.263    | 1.257                |
| C(22)-C(23)                    | 1.411(3)<br>) | 1.41<br>9 | 1.41<br>9            | 1.418    | 1.420                |
| C(23)-C(24)                    | 1.382(3)<br>) | 1.39<br>8 | 1.40<br>6            | 1.398    | 1.403                |
| C(24)-O(25)                    | 1.285(2)<br>) | 1.28<br>5 | 1.27<br>4            | 1.285    | 1.276                |

**Table S3** Selected experimental bond lengths (Å) of **4** and **5** and the corresponding calculated bond lengths

| bonds                          | exp.     |          | calc.    |          |
|--------------------------------|----------|----------|----------|----------|
|                                | <b>4</b> | <b>5</b> | <b>4</b> | <b>5</b> |
| V(1)-O(1) <sub>phenolato</sub> | 1.929(2) | 1.924(2) | 1.911    | 1.908    |
| V(1)-N(9) <sub>imine</sub>     | 2.106(2) | 2.130(2) | 2.138    | 2.153    |
| V(1)-N(18) <sub>py</sub>       | 2.104(2) | 2.116(2) | 2.145    | 2.153    |
| V(1)-O(21)                     | 1.917(2) | 2.158(2) | 1.847    | 2.160    |
| V(1)-O(28)                     | 2.130(2) |          | 2.149    |          |
| V(1)-N(28)                     |          | 1.907(2) |          | 1.883    |
| V(1)-O(40) <sub>oxo</sub>      | 1.623(2) | 1.594(2) | 1.589    | 1.587    |
| O(1)-C(2)                      | 1.310(2) | 1.304(4) | 1.303    | 1.306    |
| C(8)-N(9)                      | 1.310(2) | 1.289(4) | 1.308    | 1.308    |
| O(21)-C(22)                    | 1.318(2) | 1.293(3) | 1.330    | 1.289    |
| C(22)-C(23)                    | 1.428(2) | 1.402(4) | 1.420    | 1.421    |
| C(23)-C(24)                    | 1.388(2) | 1.375(4) | 1.393    | 1.383    |
| C(24)-C(25)                    | 1.429(2) | 1.385(5) | 1.426    | 1.413    |
| C(25)-C(26)                    | 1.381(2) | 1.384(4) | 1.389    | 1.395    |
| C(26)-C(27)                    | 1.420(2) | 1.395(4) | 1.415    | 1.398    |
| C(22)-C(27)                    | 1.435(2) | 1.433(4) | 1.433    | 1.442    |
| C(27)-O(28)                    | 1.292(2) |          | 1.298    |          |
| C(27)-N(28)                    |          | 1.359(4) |          | 1.371    |

**Table S4** Selected experimental bond lengths (Å) of  $6 \cdot \frac{1}{2} \text{CH}_2\text{Cl}_2$ 

|                               |          |             |          |
|-------------------------------|----------|-------------|----------|
| V(1)-O(1) <sub>oxo</sub>      | 1.591(2) | V(2)-O(2)   | 1.586(3) |
| )                             | )        | )           | )        |
| V(1)-N(1) <sub>py</sub>       | 2.104(3) | V(2)-N(29)  | 2.100(3) |
| )                             | )        | )           | )        |
| V(1)-N(11) <sub>imine</sub>   | 2.072(2) | V(2)-N(31)  | 2.080(3) |
| )                             | )        | )           | )        |
| V(1)-                         | 1.972(2) | V(2)-O(39)  | 1.956(2) |
| O(19) <sub>phenolato</sub>    | )        | )           | )        |
| V(1)-O(41) <sub>sulfato</sub> | 1.963(2) | V(2)-O(42)  | 1.985(2) |
| )                             | )        | )           | )        |
| V(1)-O(39)                    | 2.436(2) | V(2)-O(19)  | 2.482(2) |
| )                             | )        | )           | )        |
| N(11)-C(12)                   | 1.292(4) | N(31)-      | 1.301(4) |
| )                             | )        | C(32)       | )        |
| N(1)-C(10)                    | 1.370(4) | N(21)-      | 1.368(4) |
| )                             | )        | C(30)       | )        |
| C(9)-C(10)                    | 1.418(5) | C(29)-C(30) | 1.425(4) |
| )                             | )        | )           | )        |
| C(9)-N(11)                    | 1.422(4) | C(29)-      | 1.419(4) |
| )                             | )        | N(31)       | )        |
| C(12)-C(13)                   | 1.439(4) | C(32)-C(33) | 1.438(5) |
| )                             | )        | )           | )        |
| C(13)-C(18)                   | 1.421(4) | C(33)-C(38) | 1.409(5) |
| )                             | )        | )           | )        |
| C(18)-O(19)                   | 1.334(4) | C(38)-      | 1.348(4) |
| )                             | )        | O(39)       | )        |

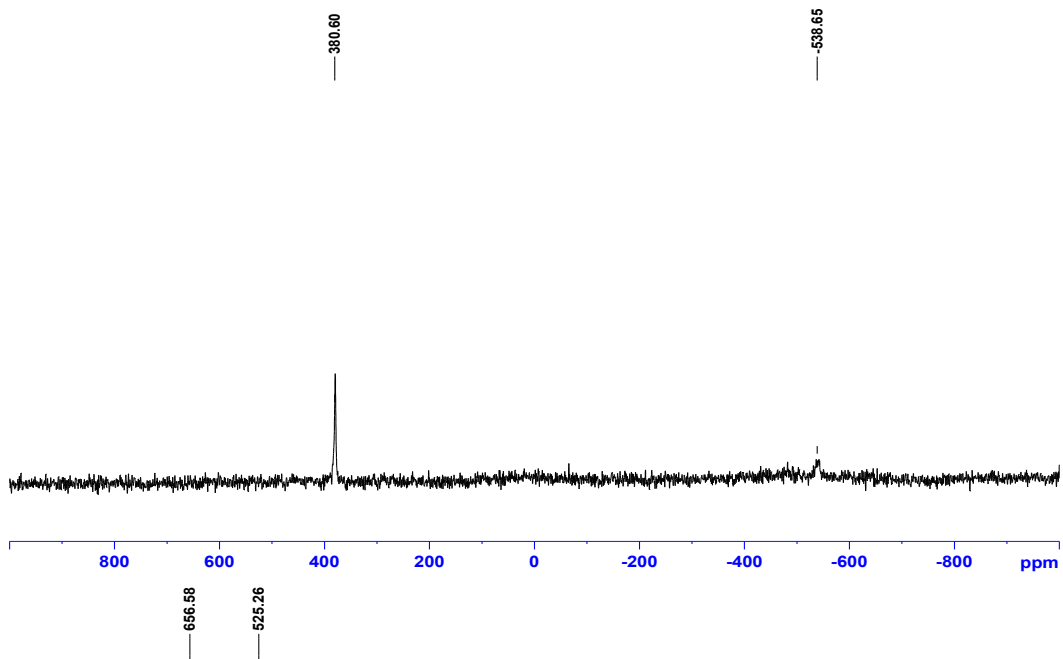

(a)

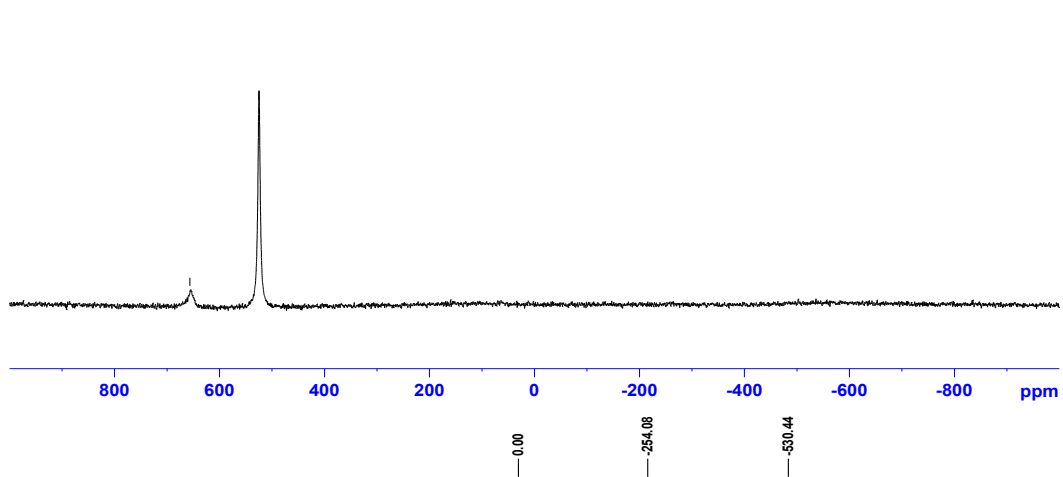

(b)

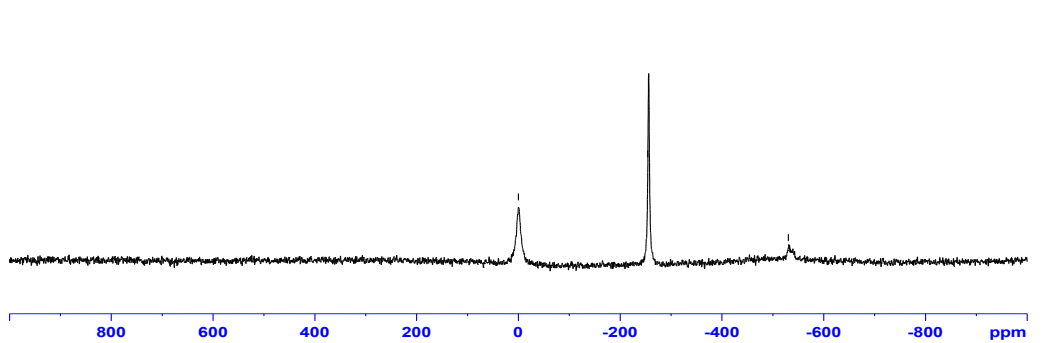

(c)

**Fig. S1** Fluid solution  $^{51}\text{V}$  NMR of (a) **3**, (b) **4** and (c) **5**

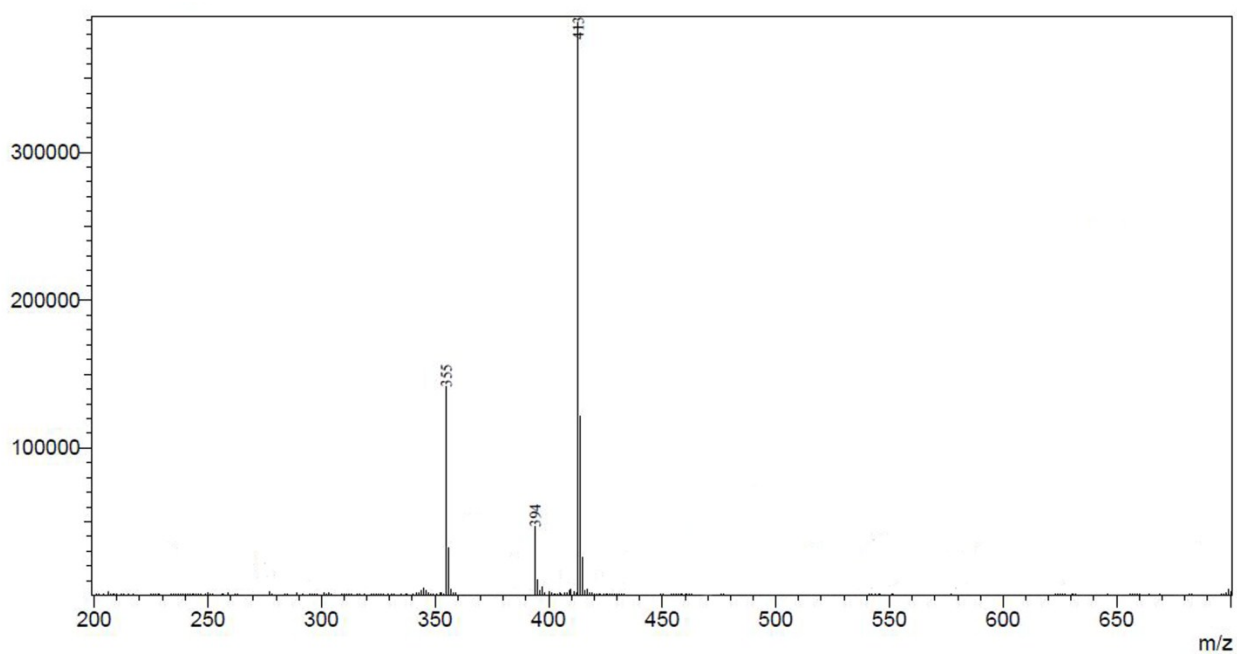

**Fig. S2** ESI mass spectrum of **1**.

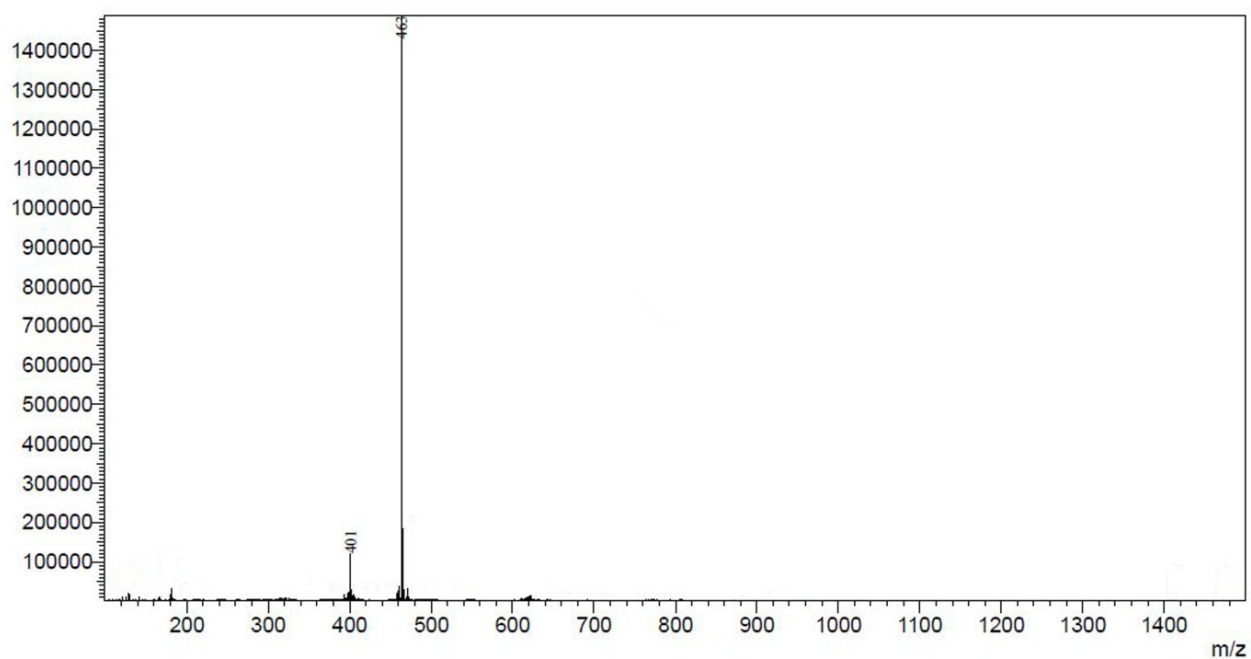

**Fig. S3** ESI mass spectrum of **2**.

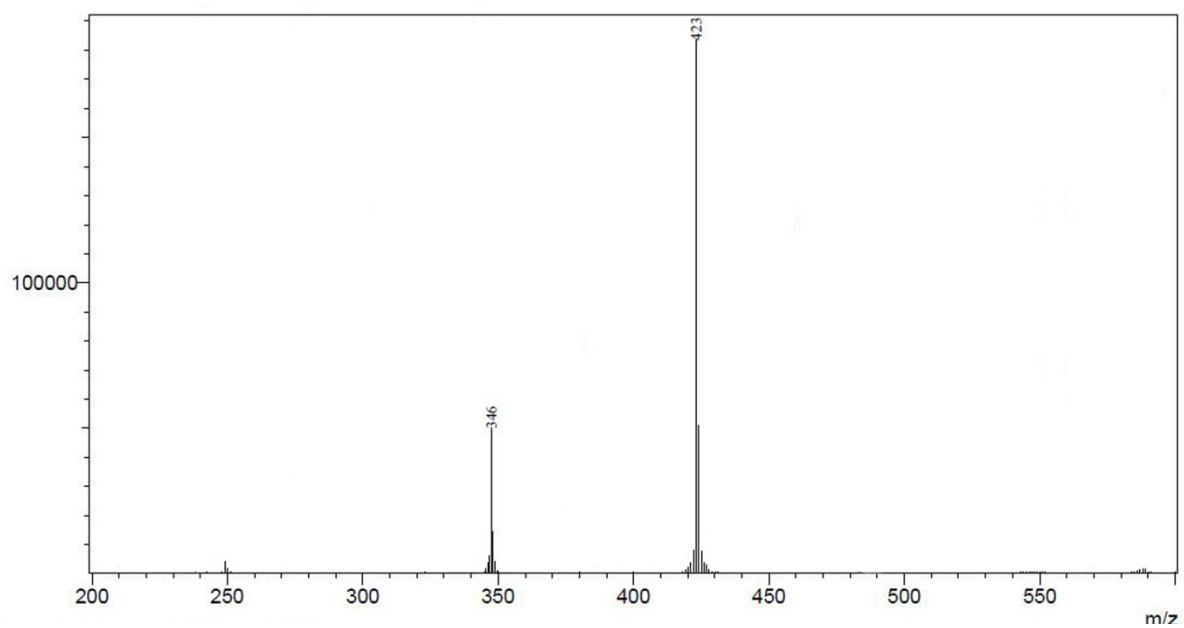

**Fig. S4** ESI mass spectrum of **3**.

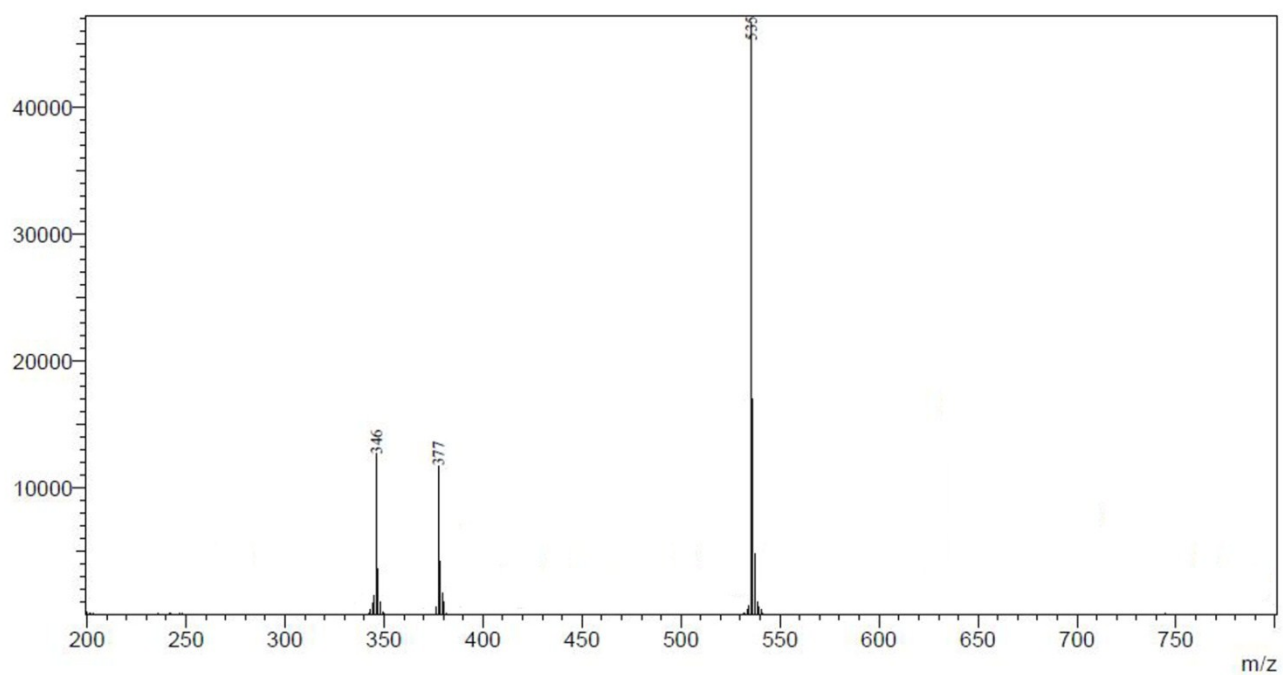

**Fig. S5** ESI mass spectrum of **4**.



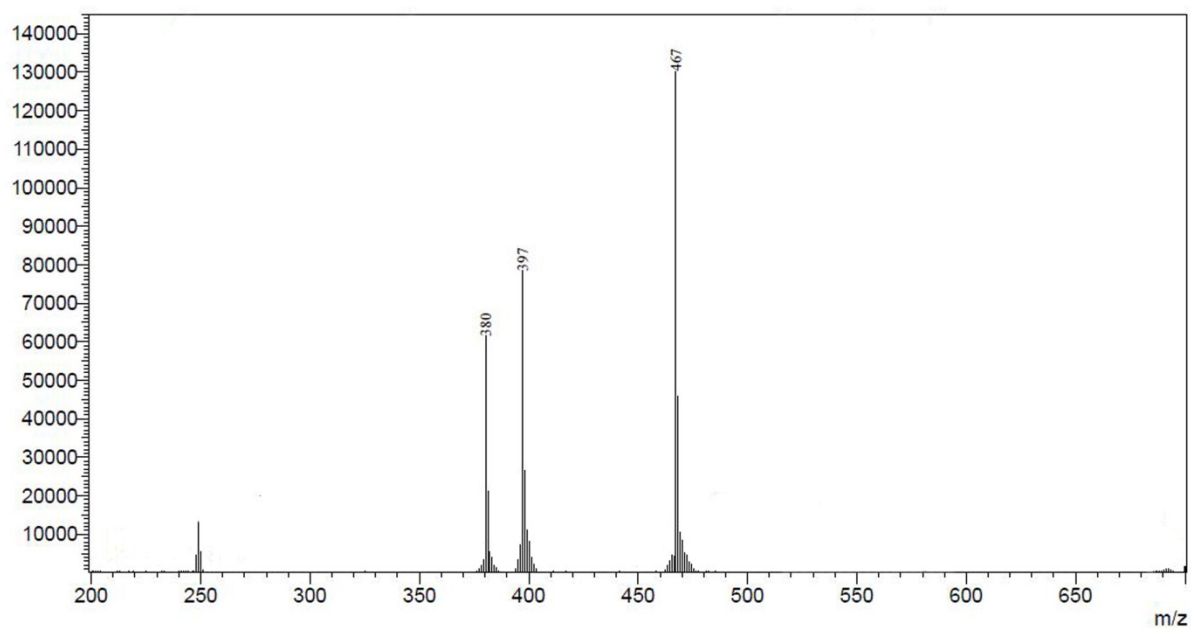

**Fig. S6** ESI mass spectrum of **5**.

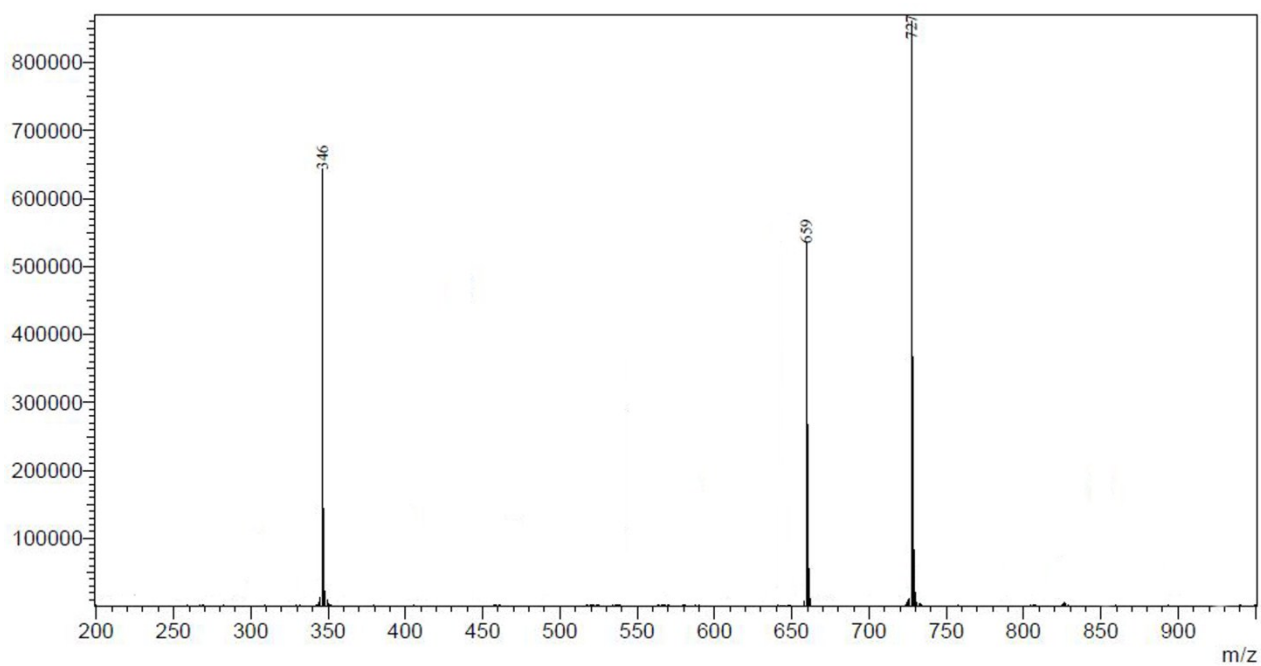

**Fig. S7** ESI mass spectrum of **6**.

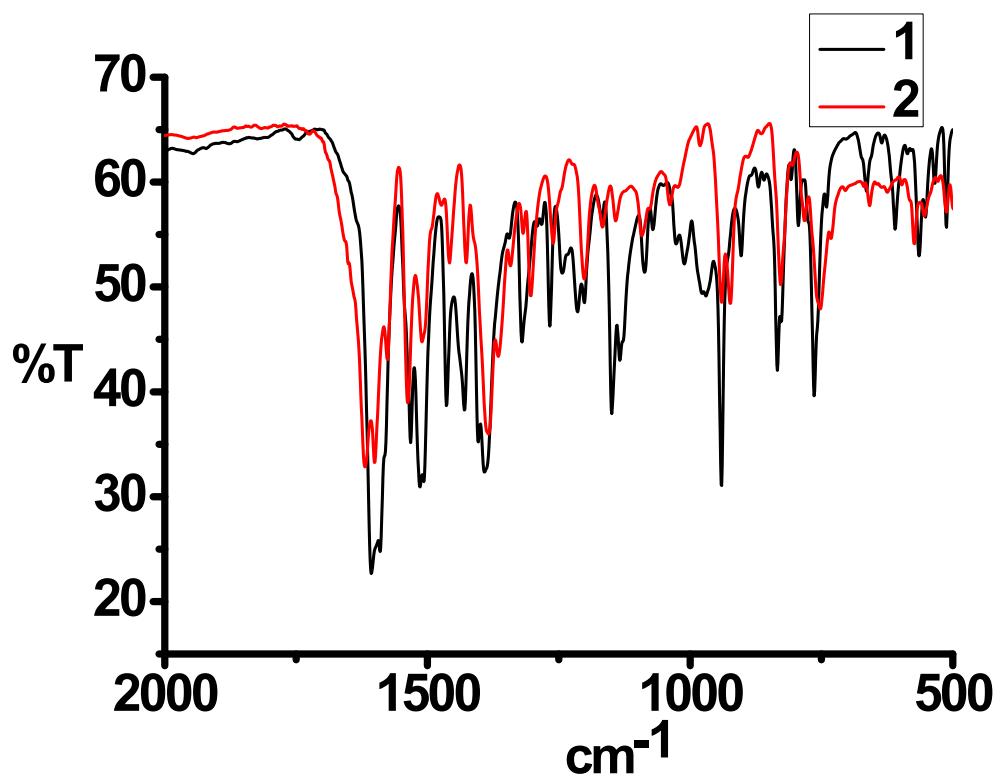

Fig. S8 FT-IR spectra of 1 and 2.

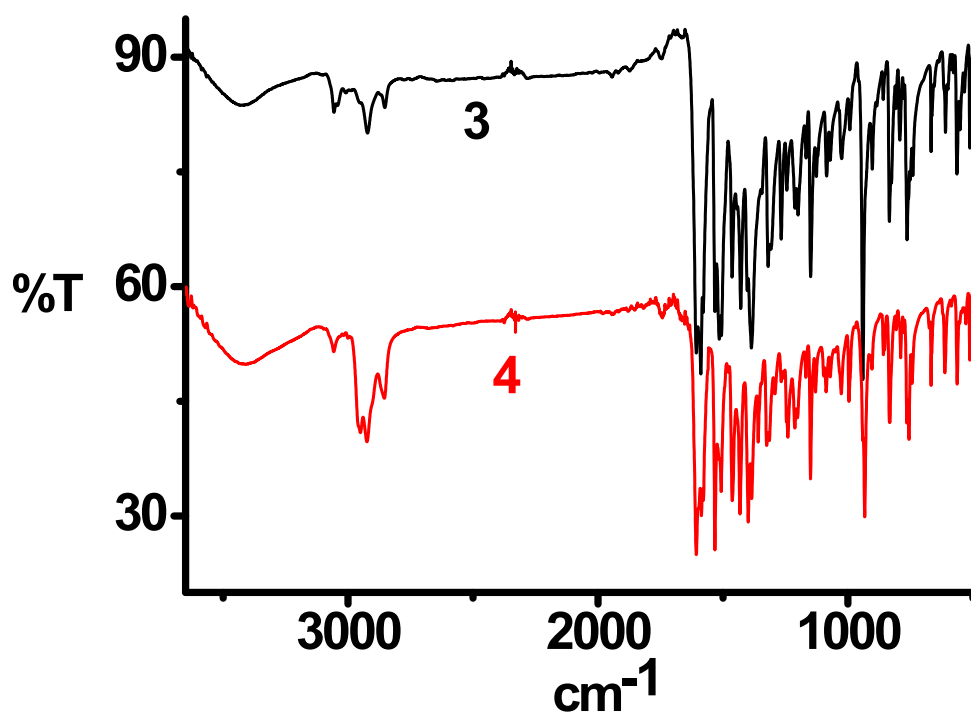

Fig. S9 FT-IR spectra of 3 and 4.

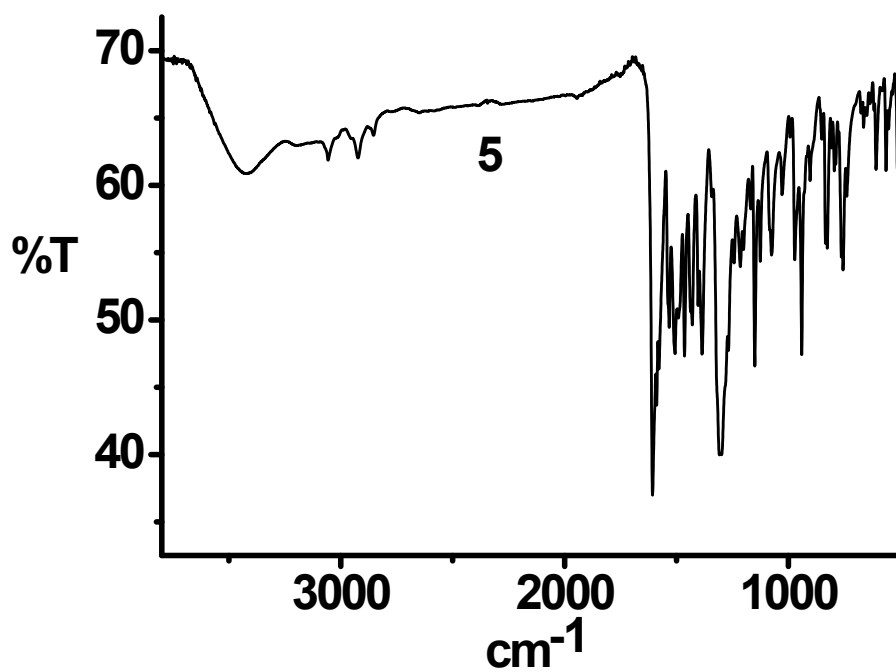

Fig. S10 FT-IR spectrum of 5.

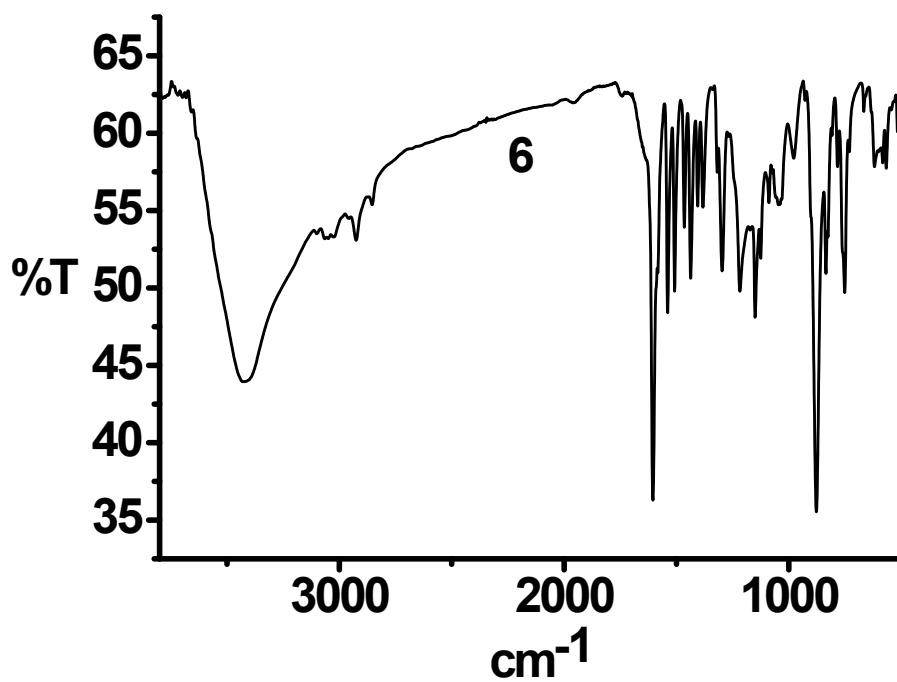

Fig. S11 FT-IR spectrum of 6.

**Table S5** Gas phase optimized coordinates of **1** (doublet)

| Center Number | Atomic Number | Atomic Type | Coordinates (Angstroms) |           |           |
|---------------|---------------|-------------|-------------------------|-----------|-----------|
|               |               |             | X                       | Y         | Z         |
| 1             | 23            | 0           | 3.620896                | 1.029631  | 4.882894  |
| 2             | 8             | 0           | 4.542908                | 2.302148  | 5.115847  |
| 3             | 8             | 0           | 1.818518                | 1.787321  | 5.001148  |
| 4             | 6             | 0           | 1.191028                | 2.529442  | 4.143611  |
| 5             | 6             | 0           | 0.033709                | 3.243322  | 4.571364  |
| 6             | 1             | 0           | -0.258975               | 3.130691  | 5.610916  |
| 7             | 6             | 0           | -0.674299               | 4.053727  | 3.706011  |
| 8             | 1             | 0           | -1.545948               | 4.591524  | 4.072745  |
| 9             | 6             | 0           | -0.286477               | 4.198054  | 2.352062  |
| 10            | 1             | 0           | -0.851949               | 4.839086  | 1.682532  |
| 11            | 6             | 0           | 0.816529                | 3.505938  | 1.900651  |
| 12            | 1             | 0           | 1.124443                | 3.595021  | 0.860114  |
| 13            | 6             | 0           | 1.580075                | 2.664166  | 2.759878  |
| 14            | 6             | 0           | 2.661577                | 1.944851  | 2.173353  |
| 15            | 1             | 0           | 2.767685                | 2.082359  | 1.094524  |
| 16            | 7             | 0           | 3.502029                | 1.152190  | 2.788423  |
| 17            | 6             | 0           | 4.473440                | 0.408020  | 2.092539  |
| 18            | 6             | 0           | 4.587192                | 0.282341  | 0.713003  |
| 19            | 1             | 0           | 3.873560                | 0.764281  | 0.053474  |
| 20            | 6             | 0           | 5.622368                | -0.483455 | 0.130906  |
| 21            | 1             | 0           | 5.676585                | -0.550191 | -0.952286 |
| 22            | 6             | 0           | 6.549885                | -1.144990 | 0.908865  |
| 23            | 1             | 0           | 7.342173                | -1.734283 | 0.454987  |
| 24            | 6             | 0           | 6.460005                | -1.068403 | 2.322885  |
| 25            | 6             | 0           | 7.354566                | -1.731690 | 3.203475  |
| 26            | 1             | 0           | 8.165097                | -2.325614 | 2.787500  |
| 27            | 6             | 0           | 7.188532                | -1.620501 | 4.566287  |
| 28            | 1             | 0           | 7.858570                | -2.116084 | 5.261516  |
| 29            | 6             | 0           | 6.118096                | -0.842707 | 5.062957  |
| 30            | 1             | 0           | 5.943261                | -0.728184 | 6.128794  |
| 31            | 7             | 0           | 5.271491                | -0.214455 | 4.266503  |
| 32            | 6             | 0           | 5.414196                | -0.297936 | 2.911618  |
| 33            | 8             | 0           | 2.571853                | -0.900772 | 4.425994  |
| 34            | 6             | 0           | 1.972150                | -1.666390 | 5.232421  |
| 35            | 6             | 0           | 2.044526                | -1.555640 | 6.644895  |
| 36            | 1             | 0           | 1.483760                | -2.263748 | 7.244702  |
| 37            | 6             | 0           | 2.827207                | -0.607128 | 7.309964  |
| 38            | 8             | 0           | 3.550924                | 0.290211  | 6.742520  |
| 39            | 6             | 0           | 1.132481                | -2.773682 | 4.621004  |
| 40            | 1             | 0           | 0.338796                | -2.326356 | 4.010314  |
| 41            | 1             | 0           | 0.678692                | -3.426742 | 5.372220  |

|    |   |   |          |           |          |
|----|---|---|----------|-----------|----------|
| 42 | 1 | 0 | 1.756076 | -3.375017 | 3.948870 |
| 43 | 6 | 0 | 2.882616 | -0.598500 | 8.823032 |
| 44 | 1 | 0 | 3.923944 | -0.689597 | 9.154736 |
| 45 | 1 | 0 | 2.291256 | -1.403812 | 9.267911 |
| 46 | 1 | 0 | 2.512753 | 0.365950  | 9.191522 |

**Table S6** Gas phase optimized coordinates of **1<sup>-</sup>** (singlet)

| Center Number | Atomic Number | Atomic Type | Coordinates (Angstroms) |           |           |
|---------------|---------------|-------------|-------------------------|-----------|-----------|
|               |               |             | X                       | Y         | Z         |
| 1             | 23            | 0           | 3.639870                | 1.125661  | 4.853353  |
| 2             | 8             | 0           | 4.610654                | 2.367002  | 5.117533  |
| 3             | 8             | 0           | 1.823053                | 1.920752  | 5.035257  |
| 4             | 6             | 0           | 1.142760                | 2.540494  | 4.118732  |
| 5             | 6             | 0           | -0.090998               | 3.158659  | 4.472560  |
| 6             | 1             | 0           | -0.420344               | 3.032762  | 5.500977  |
| 7             | 6             | 0           | -0.834867               | 3.901245  | 3.565941  |
| 8             | 1             | 0           | -1.771962               | 4.356573  | 3.884084  |
| 9             | 6             | 0           | -0.376609               | 4.084018  | 2.245604  |
| 10            | 1             | 0           | -0.950801               | 4.672572  | 1.533540  |
| 11            | 6             | 0           | 0.822352                | 3.495531  | 1.868764  |
| 12            | 1             | 0           | 1.183810                | 3.622118  | 0.847919  |
| 13            | 6             | 0           | 1.598479                | 2.702589  | 2.753625  |
| 14            | 6             | 0           | 2.805578                | 2.125805  | 2.233048  |
| 15            | 1             | 0           | 3.124701                | 2.515768  | 1.259904  |
| 16            | 7             | 0           | 3.523796                | 1.163233  | 2.790342  |
| 17            | 6             | 0           | 4.508890                | 0.484315  | 2.100179  |
| 18            | 6             | 0           | 4.691690                | 0.470840  | 0.706983  |
| 19            | 1             | 0           | 4.003464                | 1.008933  | 0.063568  |
| 20            | 6             | 0           | 5.729113                | -0.282186 | 0.126815  |
| 21            | 1             | 0           | 5.841247                | -0.268516 | -0.956114 |
| 22            | 6             | 0           | 6.585694                | -1.062018 | 0.890046  |
| 23            | 1             | 0           | 7.369657                | -1.654982 | 0.424051  |
| 24            | 6             | 0           | 6.421092                | -1.104803 | 2.301857  |
| 25            | 6             | 0           | 7.194566                | -1.912960 | 3.172347  |
| 26            | 1             | 0           | 7.979051                | -2.542458 | 2.755730  |
| 27            | 6             | 0           | 6.941694                | -1.903266 | 4.535094  |
| 28            | 1             | 0           | 7.519514                | -2.518339 | 5.219799  |
| 29            | 6             | 0           | 5.938792                | -1.054619 | 5.039226  |
| 30            | 1             | 0           | 5.730233                | -0.982809 | 6.102461  |
| 31            | 7             | 0           | 5.212739                | -0.267863 | 4.252421  |
| 32            | 6             | 0           | 5.403478                | -0.299157 | 2.904833  |
| 33            | 8             | 0           | 2.507934                | -0.874948 | 4.453067  |
| 34            | 6             | 0           | 1.991165                | -1.649677 | 5.300003  |

|    |   |   |          |           |          |
|----|---|---|----------|-----------|----------|
| 35 | 6 | 0 | 2.147788 | -1.541185 | 6.706356 |
| 36 | 1 | 0 | 1.648175 | -2.269992 | 7.337461 |
| 37 | 6 | 0 | 2.923799 | -0.548460 | 7.330065 |
| 38 | 8 | 0 | 3.572032 | 0.371559  | 6.732703 |
| 39 | 6 | 0 | 1.138369 | -2.788320 | 4.747639 |
| 40 | 1 | 0 | 0.292771 | -2.364225 | 4.191560 |
| 41 | 1 | 0 | 0.754374 | -3.453474 | 5.529370 |
| 42 | 1 | 0 | 1.731711 | -3.374051 | 4.034647 |
| 43 | 6 | 0 | 3.043722 | -0.538383 | 8.846994 |
| 44 | 1 | 0 | 4.100996 | -0.594164 | 9.136782 |
| 45 | 1 | 0 | 2.500495 | -1.366038 | 9.316108 |
| 46 | 1 | 0 | 2.654098 | 0.410868  | 9.235980 |

**Table S7** Gas phase optimized coordinates of **2** (doublet)

| Center Number | Atomic Number | Atomic Type | Coordinates (Angstroms) |           |           |
|---------------|---------------|-------------|-------------------------|-----------|-----------|
|               |               |             | X                       | Y         | Z         |
| 1             | 23            | 0           | 3.594613                | 1.037845  | 4.882609  |
| 2             | 8             | 0           | 4.521524                | 2.310616  | 5.102253  |
| 3             | 8             | 0           | 1.798841                | 1.766250  | 4.986441  |
| 4             | 6             | 0           | 1.177441                | 2.546210  | 4.144712  |
| 5             | 6             | 0           | 0.050356                | 3.265242  | 4.564906  |
| 6             | 1             | 0           | -0.256653               | 3.149710  | 5.600733  |
| 7             | 6             | 0           | 0.861797                | 3.539126  | 1.901791  |
| 8             | 1             | 0           | 1.177311                | 3.632910  | 0.863255  |
| 9             | 6             | 0           | 1.584914                | 2.689883  | 2.753867  |
| 10            | 6             | 0           | 2.665864                | 1.957467  | 2.163111  |
| 11            | 1             | 0           | 2.780154                | 2.104376  | 1.086113  |
| 12            | 7             | 0           | 3.486077                | 1.152602  | 2.778301  |
| 13            | 6             | 0           | 4.456866                | 0.398768  | 2.087825  |
| 14            | 6             | 0           | 4.557077                | 0.254012  | 0.709967  |
| 15            | 1             | 0           | 3.833598                | 0.722565  | 0.051326  |
| 16            | 6             | 0           | 5.589827                | -0.516163 | 0.129240  |
| 17            | 1             | 0           | 5.635207                | -0.599045 | -0.953149 |
| 18            | 6             | 0           | 6.525640                | -1.162253 | 0.910103  |
| 19            | 1             | 0           | 7.317050                | -1.754323 | 0.458168  |
| 20            | 6             | 0           | 6.446443                | -1.068424 | 2.323787  |
| 21            | 6             | 0           | 7.350278                | -1.718454 | 3.205023  |
| 22            | 1             | 0           | 8.160444                | -2.313525 | 2.790044  |
| 23            | 6             | 0           | 7.192273                | -1.592905 | 4.567295  |
| 24            | 1             | 0           | 7.868716                | -2.077931 | 5.263763  |
| 25            | 6             | 0           | 6.119797                | -0.816014 | 5.062184  |
| 26            | 1             | 0           | 5.949670                | -0.694084 | 6.128072  |

|    |   |   |           |           |          |
|----|---|---|-----------|-----------|----------|
| 27 | 7 | 0 | 5.265465  | -0.199298 | 4.265682 |
| 28 | 6 | 0 | 5.402105  | -0.295026 | 2.911255 |
| 29 | 8 | 0 | 2.585980  | -0.911007 | 4.414834 |
| 30 | 6 | 0 | 1.977663  | -1.672014 | 5.219426 |
| 31 | 6 | 0 | 2.031330  | -1.552181 | 6.631876 |
| 32 | 1 | 0 | 1.466144  | -2.259932 | 7.227951 |
| 33 | 6 | 0 | 2.801625  | -0.597779 | 7.303312 |
| 34 | 8 | 0 | 3.526677  | 0.302329  | 6.742174 |
| 35 | 6 | 0 | 1.148623  | -2.785740 | 4.605022 |
| 36 | 1 | 0 | 0.355271  | -2.343961 | 3.989765 |
| 37 | 1 | 0 | 0.694370  | -3.440231 | 5.354699 |
| 38 | 1 | 0 | 1.779411  | -3.384238 | 3.937136 |
| 39 | 6 | 0 | 2.840373  | -0.585949 | 8.816873 |
| 40 | 1 | 0 | 3.878582  | -0.670185 | 9.159988 |
| 41 | 1 | 0 | 2.249018  | -1.393898 | 9.256942 |
| 42 | 1 | 0 | 2.460704  | 0.377017  | 9.179203 |
| 43 | 6 | 0 | -0.253874 | 4.268838  | 2.334551 |
| 44 | 6 | 0 | -0.668506 | 4.118620  | 3.708525 |
| 45 | 6 | 0 | -0.986226 | 5.137759  | 1.469485 |
| 46 | 6 | 0 | -2.079263 | 5.831459  | 1.929666 |
| 47 | 1 | 0 | -2.631652 | 6.491728  | 1.266675 |
| 48 | 6 | 0 | -2.491756 | 5.685422  | 3.286545 |
| 49 | 6 | 0 | -1.810649 | 4.857269  | 4.147743 |
| 50 | 1 | 0 | -3.357743 | 6.238906  | 3.641618 |
| 51 | 1 | 0 | -2.132326 | 4.753036  | 5.181268 |
| 52 | 1 | 0 | -0.660611 | 5.240979  | 0.436213 |

**Table S8** Gas phase optimized coordinates of **2<sup>-</sup>** (singlet)

| Center Number | Atomic Number | Atomic Type | Coordinates (Angstroms) |          |          |
|---------------|---------------|-------------|-------------------------|----------|----------|
|               |               |             | X                       | Y        | Z        |
| 1             | 23            | 0           | 3.581895                | 1.130258 | 4.848881 |
| 2             | 8             | 0           | 4.518079                | 2.391600 | 5.126452 |
| 3             | 8             | 0           | 1.748116                | 1.814201 | 4.994925 |
| 4             | 6             | 0           | 1.123403                | 2.570252 | 4.130663 |
| 5             | 6             | 0           | -0.068358               | 3.208174 | 4.488049 |
| 6             | 1             | 0           | -0.446957               | 3.025547 | 5.491262 |
| 7             | 6             | 0           | 0.970694                | 3.696275 | 1.944448 |
| 8             | 1             | 0           | 1.368700                | 3.875380 | 0.944977 |
| 9             | 6             | 0           | 1.655502                | 2.813769 | 2.787618 |
| 10            | 6             | 0           | 2.851721                | 2.198097 | 2.283019 |
| 11            | 1             | 0           | 3.246299                | 2.625006 | 1.354309 |

|    |   |   |           |           |           |
|----|---|---|-----------|-----------|-----------|
| 12 | 7 | 0 | 3.488625  | 1.158007  | 2.812634  |
| 13 | 6 | 0 | 4.430462  | 0.440031  | 2.110184  |
| 14 | 6 | 0 | 4.559664  | 0.381208  | 0.714750  |
| 15 | 1 | 0 | 3.849620  | 0.907918  | 0.085192  |
| 16 | 6 | 0 | 5.567283  | -0.404408 | 0.121931  |
| 17 | 1 | 0 | 5.635771  | -0.432156 | -0.964117 |
| 18 | 6 | 0 | 6.450634  | -1.159846 | 0.878575  |
| 19 | 1 | 0 | 7.214060  | -1.772054 | 0.403808  |
| 20 | 6 | 0 | 6.346500  | -1.144781 | 2.296751  |
| 21 | 6 | 0 | 7.166437  | -1.902966 | 3.170592  |
| 22 | 1 | 0 | 7.938128  | -2.546186 | 2.751185  |
| 23 | 6 | 0 | 6.977618  | -1.824782 | 4.539473  |
| 24 | 1 | 0 | 7.592839  | -2.399140 | 5.226736  |
| 25 | 6 | 0 | 5.982789  | -0.965062 | 5.047322  |
| 26 | 1 | 0 | 5.813622  | -0.850580 | 6.113894  |
| 27 | 7 | 0 | 5.210864  | -0.232008 | 4.256538  |
| 28 | 6 | 0 | 5.350268  | -0.321865 | 2.906849  |
| 29 | 8 | 0 | 2.549638  | -0.928717 | 4.446887  |
| 30 | 6 | 0 | 2.035539  | -1.704479 | 5.292246  |
| 31 | 6 | 0 | 2.181792  | -1.583613 | 6.700107  |
| 32 | 1 | 0 | 1.691699  | -2.316512 | 7.333518  |
| 33 | 6 | 0 | 2.934363  | -0.574062 | 7.319596  |
| 34 | 8 | 0 | 3.564740  | 0.360333  | 6.721144  |
| 35 | 6 | 0 | 1.201701  | -2.857032 | 4.741861  |
| 36 | 1 | 0 | 0.344405  | -2.446386 | 4.193890  |
| 37 | 1 | 0 | 0.835275  | -3.531455 | 5.523813  |
| 38 | 1 | 0 | 1.800921  | -3.428475 | 4.022524  |
| 39 | 6 | 0 | 3.052084  | -0.553815 | 8.835800  |
| 40 | 1 | 0 | 4.110048  | -0.585292 | 9.126196  |
| 41 | 1 | 0 | 2.526101  | -1.390283 | 9.308366  |
| 42 | 1 | 0 | 2.642050  | 0.389173  | 9.218466  |
| 43 | 6 | 0 | -0.231114 | 4.340999  | 2.310035  |
| 44 | 6 | 0 | -0.768824 | 4.078574  | 3.621228  |
| 45 | 6 | 0 | -0.930396 | 5.223452  | 1.440263  |
| 46 | 6 | 0 | -2.107841 | 5.834230  | 1.830709  |
| 47 | 1 | 0 | -2.628354 | 6.507095  | 1.152144  |
| 48 | 6 | 0 | -2.637095 | 5.580718  | 3.122681  |
| 49 | 6 | 0 | -1.982554 | 4.724976  | 3.990441  |
| 50 | 1 | 0 | -3.563509 | 6.062394  | 3.430460  |
| 51 | 1 | 0 | -2.391891 | 4.532255  | 4.981003  |
| 52 | 1 | 0 | -0.517201 | 5.412414  | 0.449872  |



**Table S9** Gas phase optimized coordinates of **4** (singlet)

| Center Number | Atomic Number | Atomic Type | Coordinates (Angstroms) |           |           |
|---------------|---------------|-------------|-------------------------|-----------|-----------|
|               |               |             | X                       | Y         | Z         |
| 1             | 23            | 0           | 3.843062                | 7.490158  | 5.003366  |
| 2             | 8             | 0           | 5.136932                | 7.210676  | 4.123488  |
| 3             | 8             | 0           | 2.583080                | 6.293543  | 4.206779  |
| 4             | 6             | 0           | 2.587909                | 4.993839  | 4.106421  |
| 5             | 6             | 0           | 1.881183                | 4.374415  | 3.043543  |
| 6             | 6             | 0           | 1.862729                | 2.996689  | 2.914699  |
| 7             | 6             | 0           | 2.526301                | 2.161834  | 3.843154  |
| 8             | 6             | 0           | 3.198584                | 2.740129  | 4.900908  |
| 9             | 6             | 0           | 3.250045                | 4.151170  | 5.059829  |
| 10            | 6             | 0           | 3.882857                | 4.687941  | 6.218530  |
| 11            | 7             | 0           | 4.059070                | 5.957503  | 6.478696  |
| 12            | 6             | 0           | 4.577511                | 6.377542  | 7.716465  |
| 13            | 6             | 0           | 4.614713                | 5.643902  | 8.893747  |
| 14            | 6             | 0           | 5.208138                | 6.183637  | 10.058852 |
| 15            | 6             | 0           | 5.753328                | 7.451612  | 10.065187 |
| 16            | 6             | 0           | 5.700402                | 8.248388  | 8.891021  |
| 17            | 6             | 0           | 6.209318                | 9.570816  | 8.800622  |
| 18            | 6             | 0           | 6.089598                | 10.269008 | 7.619364  |
| 19            | 6             | 0           | 5.444056                | 9.660334  | 6.518614  |
| 20            | 7             | 0           | 4.959994                | 8.429437  | 6.576149  |
| 21            | 6             | 0           | 5.089731                | 7.707211  | 7.725577  |
| 22            | 8             | 0           | 3.337358                | 9.073679  | 4.197582  |
| 23            | 6             | 0           | 2.342558                | 9.823326  | 4.664238  |
| 24            | 6             | 0           | 1.897286                | 11.035243 | 4.072087  |
| 25            | 6             | 0           | 0.851127                | 11.678990 | 4.729438  |
| 26            | 6             | 0           | 0.240127                | 11.193348 | 5.923393  |
| 27            | 6             | 0           | 0.699708                | 10.007339 | 6.482332  |
| 28            | 6             | 0           | 1.753134                | 9.296222  | 5.859246  |
| 29            | 8             | 0           | 2.267048                | 8.184419  | 6.288594  |
| 30            | 6             | 0           | 2.522677                | 11.567283 | 2.769774  |
| 31            | 6             | 0           | 4.035315                | 11.830857 | 2.977328  |
| 32            | 6             | 0           | 2.333691                | 10.524130 | 1.639345  |
| 33            | 6             | 0           | 1.874445                | 12.888348 | 2.308507  |
| 34            | 6             | 0           | -0.910935               | 12.006263 | 6.547739  |
| 35            | 6             | 0           | -0.401081               | 13.417407 | 6.932051  |
| 36            | 6             | 0           | -2.067835               | 12.141586 | 5.526706  |
| 37            | 6             | 0           | -1.477784               | 11.343965 | 7.819064  |
| 38            | 1             | 0           | 1.370470                | 5.019171  | 2.335121  |
| 39            | 1             | 0           | 1.325905                | 2.548456  | 2.081802  |
| 40            | 1             | 0           | 2.499823                | 1.082632  | 3.727397  |
| 41            | 1             | 0           | 3.702622                | 2.115377  | 5.636121  |

|    |   |   |           |           |           |
|----|---|---|-----------|-----------|-----------|
| 42 | 1 | 0 | 4.235412  | 3.954206  | 6.948457  |
| 43 | 1 | 0 | 4.171061  | 4.654760  | 8.943054  |
| 44 | 1 | 0 | 5.223613  | 5.583221  | 10.964176 |
| 45 | 1 | 0 | 6.206822  | 7.858269  | 10.965145 |
| 46 | 1 | 0 | 6.686224  | 10.019655 | 9.668580  |
| 47 | 1 | 0 | 6.468983  | 11.280633 | 7.518005  |
| 48 | 1 | 0 | 5.312362  | 10.188356 | 5.580213  |
| 49 | 1 | 0 | 0.471594  | 12.601826 | 4.309351  |
| 50 | 1 | 0 | 0.274628  | 9.582791  | 7.384481  |
| 51 | 1 | 0 | 4.196230  | 12.565875 | 3.776776  |
| 52 | 1 | 0 | 4.477379  | 12.233085 | 2.056514  |
| 53 | 1 | 0 | 4.567098  | 10.910439 | 3.232038  |
| 54 | 1 | 0 | 2.812988  | 9.573734  | 1.887050  |
| 55 | 1 | 0 | 2.773448  | 10.898063 | 0.705336  |
| 56 | 1 | 0 | 1.267859  | 10.336149 | 1.460297  |
| 57 | 1 | 0 | 0.804139  | 12.771035 | 2.101085  |
| 58 | 1 | 0 | 2.354215  | 13.221804 | 1.380531  |
| 59 | 1 | 0 | 1.996202  | 13.688839 | 3.048554  |
| 60 | 1 | 0 | -1.213204 | 14.008229 | 7.375776  |
| 61 | 1 | 0 | -0.024126 | 13.967770 | 6.063377  |
| 62 | 1 | 0 | 0.411716  | 13.351684 | 7.665525  |
| 63 | 1 | 0 | -2.447435 | 11.155444 | 5.234041  |
| 64 | 1 | 0 | -1.753124 | 12.662087 | 4.615941  |
| 65 | 1 | 0 | -2.897910 | 12.710426 | 5.965614  |
| 66 | 1 | 0 | -0.717509 | 11.245184 | 8.602818  |
| 67 | 1 | 0 | -1.886811 | 10.348147 | 7.612082  |
| 68 | 1 | 0 | -2.291055 | 11.959467 | 8.222305  |

**Table S10** Gas phase optimized coordinates of **5** (singlet)

| Center Number | Atomic Number | Atomic Type | Coordinates (Angstroms) |           |          |
|---------------|---------------|-------------|-------------------------|-----------|----------|
|               |               |             | X                       | Y         | Z        |
| 1             | 6             | 0           | 1.663544                | 14.388748 | 3.315039 |
| 2             | 6             | 0           | 0.867745                | 15.561370 | 3.278448 |
| 3             | 1             | 0           | 1.141067                | 16.377951 | 3.939374 |
| 4             | 6             | 0           | -0.227260               | 15.645954 | 2.435533 |
| 5             | 1             | 0           | -0.830194               | 16.550956 | 2.437700 |
| 6             | 6             | 0           | -0.575790               | 14.581299 | 1.573428 |
| 7             | 1             | 0           | -1.437462               | 14.665669 | 0.918438 |
| 8             | 6             | 0           | 0.201140                | 13.440353 | 1.571142 |
| 9             | 1             | 0           | -0.039368               | 12.615582 | 0.902895 |
| 10            | 6             | 0           | 1.325490                | 13.313050 | 2.430353 |
| 11            | 6             | 0           | 2.144281                | 12.151848 | 2.322710 |
| 12            | 1             | 0           | 1.877284                | 11.454384 | 1.524015 |

|    |    |   |          |           |          |
|----|----|---|----------|-----------|----------|
| 13 | 6  | 0 | 3.989765 | 10.758591 | 2.793437 |
| 14 | 6  | 0 | 4.101674 | 10.103263 | 1.575552 |
| 15 | 1  | 0 | 3.568650 | 10.466283 | 0.702693 |
| 16 | 6  | 0 | 4.933992 | 8.967259  | 1.443458 |
| 17 | 1  | 0 | 4.999060 | 8.475380  | 0.477055 |
| 18 | 6  | 0 | 5.663827 | 8.486302  | 2.511118 |
| 19 | 1  | 0 | 6.300603 | 7.612613  | 2.402044 |
| 20 | 6  | 0 | 5.605739 | 9.152725  | 3.763803 |
| 21 | 6  | 0 | 6.334967 | 8.749073  | 4.911999 |
| 22 | 1  | 0 | 6.974338 | 7.871418  | 4.857727 |
| 23 | 6  | 0 | 6.227820 | 9.475190  | 6.077636 |
| 24 | 1  | 0 | 6.770943 | 9.193152  | 6.973677 |
| 25 | 6  | 0 | 5.407033 | 10.624744 | 6.100807 |
| 26 | 1  | 0 | 5.322155 | 11.232316 | 6.994841 |
| 27 | 6  | 0 | 4.780850 | 10.306308 | 3.888677 |
| 28 | 6  | 0 | 6.207325 | 14.107745 | 4.764144 |
| 29 | 6  | 0 | 7.482604 | 14.620829 | 4.403861 |
| 30 | 1  | 0 | 7.828898 | 14.492708 | 3.382863 |
| 31 | 6  | 0 | 8.253814 | 15.279784 | 5.344109 |
| 32 | 1  | 0 | 9.226017 | 15.683526 | 5.086736 |
| 33 | 6  | 0 | 7.783428 | 15.436294 | 6.667382 |
| 34 | 6  | 0 | 6.541286 | 14.945605 | 7.070675 |
| 35 | 1  | 0 | 6.207910 | 15.087825 | 8.093187 |
| 36 | 6  | 0 | 5.754234 | 14.287383 | 6.121662 |
| 37 | 7  | 0 | 3.173618 | 11.866835 | 3.077949 |
| 38 | 7  | 0 | 4.714802 | 11.028106 | 5.045467 |
| 39 | 7  | 0 | 4.517030 | 13.730736 | 6.322350 |
| 40 | 1  | 0 | 4.151154 | 13.794487 | 7.270136 |
| 41 | 7  | 0 | 8.615777 | 16.122054 | 7.638878 |
| 42 | 8  | 0 | 2.692699 | 14.339445 | 4.117573 |
| 43 | 8  | 0 | 5.403628 | 13.472891 | 3.981793 |
| 44 | 8  | 0 | 8.188221 | 16.241706 | 8.796264 |
| 45 | 8  | 0 | 9.716171 | 16.553684 | 7.268507 |
| 46 | 8  | 0 | 2.417527 | 12.309876 | 5.888418 |
| 47 | 23 | 0 | 3.569464 | 12.861803 | 4.946347 |
